# Supplementary material for: Ambient-conditions spinning of functional soft fibers via engineering molecular chain networks and phase separation
Source: PubMed Central journal article supplement (PMC10241934; doi:10.1038/s41467-023-38269-z), 2023-06-05
Supplement: 41467_2023_38269_MOESM2_ESM.pdf [file 41467_2023_38269_MOESM2_ESM.pdf]

### **Description of Additional Supplementary Files**

File Name: Supplementary Movie 1

Description: Continuous fiber spinning via NVIPS spinning approach using an extrusion-based process

File Name: Supplementary Movie 2

Description: Manual fiber spinning via NVIPS spinning approach. Solvents were removed due to the NVIPS and gravity effects

File Name: Supplementary Movie 3

Description: Manual fiber spinning via NVIPS spinning approach. Solvents were removed due to the NVIPS and gravity effects

File Name: Supplementary Movie 4

Description: Observation of the liquid droplets moving and merging under an optical microscope

File Name: Supplementary Movie 5

Description: Comparison of mechanical properties between fibers prepared via NVIPS spinning and wet spinning approaches. PAN fibers@WS were very brittle. PANSion fibers@WS were not stretchable. PANSion fibers@NVIPS were stretchable and strong

File Name: Supplementary Movie 6

Description: Monitoring high-frequency movement by a selfsensing PANSion fiber
